# Supplementary material for: Structural basis for inhibition of erythrocyte invasion by antibodies to Plasmodium falciparum protein CyRPA
Source: eLife. 2017 Feb 14;6:e21347. doi: 10.7554/eLife.21347 (PMC5349848; doi:10.7554/eLife.21347)
Supplement: Figure 4—source data 1. — Hydrogen bonds were computed using the program CONTACT within the CCP4 suite (Collaborative Computational Project N, 1994). DOI: http://dx.doi.org/10.7554/eLife.21347.009 [file elife-21347-fig4-data1.docx]

**Figure 4 – source data 1.** Potential hydrogen bonds between CyRPA and Fab 8A7. Hydrogen bonds were computed using the program CONTACT within the CCP4 suite [44]

| **CyRPA** | **Fab 8A7**1 |
| --- | --- |
| Glu 42 O | Lys 57H N |
| Lys 66 O | Arg 100H N1 |
| Lys 66 N | Asp 92L O |
| Glu 67 O1 | Thr 50L O1 |
| Glu 67 O2 | Tyr 91L OH |
| Thr 68 O | Arg 100H N1 |
| Asp 69 O | Trp 33H N |
| Asp 69 O2 | Val 99H N |
| Asp 69 O2 | Arg 100H N |
| Asp 69 O2 | Arg 100H N2 |
| Asp 69 O1 | His 35H N2 |
| Asp 69 O1 | Arg 100H N |
| Thr 71 O1 | Thr 30H O |
| Thr 71 N | Ser 31H O |
| Glu 91 O1 | Ser 31H O |
| Lys 99 N | Ser 28H O |
| Asn 116 O1 | Thr 53L O1 |
| Asn 117 O | Tyr 49L OH |
| Glu 119 O2 | Arg 101H N |

1The residue number suffices H and L denote the respective heavy and light chains of the Fab 8A7.
